# Supplementary material
Source: PubMed Central journal article supplement (PMC6821439)
Supplement: NIHMS1052979-supplement-2.pdf [file NIHMS1052979-supplement-2.pdf]

## Supporting Information

# A Bayesian Nonparametric Approach to Single Molecule Förster Resonance Energy Transfer

Ioannis Sgouralis,<sup>1</sup> Shreya Madaan,<sup>2</sup> Franky Djutanta,<sup>3</sup> Rachael Kha,<sup>4</sup> Rizal F. Hariadi,<sup>3,1</sup> and Steve Pressé<sup>1,5</sup>

<sup>1</sup>*Center for Biological Physics, Department of Physics, Arizona State University, Tempe, AZ 85287, USA*

<sup>2</sup>*School of Computing, Informatics, and Decision Systems Engineering, Arizona State University, Tempe, AZ 85287, USA*

<sup>3</sup>*Biodesign Center for Molecular Design and Biomimetics, Biodesign Institute, Arizona State University, Tempe, AZ 85287, USA*

<sup>4</sup>*School for Engineering of Matter, Transport and Energy, Arizona State University, Tempe, AZ 85287, USA*

<sup>5</sup>*School of Molecular Sciences, Arizona State University, Tempe, AZ 85287, USA<sup>a)</sup>*

### Appendix A: Notation

Table S1 summarizes the notation used throughout this study. Overall, we use  $n = 0, 1, \dots, N$  to index time levels (timestamp) and  $m = 1, 2, \dots, M$  to index molecular states. For clarity, we note that  $t_0$  is not associated with any of the intensities in  $\vec{I}^D, \vec{I}^A$  and that our analysis employs  $M = \infty$ .

In grouping similar variables, we use: arrows to denote lists (traces) over time e.g.  $\vec{s} = (s_1, s_2, \dots, s_N)$ ; tildes to denote lists over the molecule state-space e.g.  $\tilde{\lambda}^D = (\lambda_{\sigma_1}^D, \lambda_{\sigma_2}^D, \dots, \lambda_{\sigma_M}^D)$ ; double tildes to denote lists of lists over the molecular state space e.g.  $\tilde{\tilde{\pi}} = (\tilde{\pi}_{\sigma_1}, \tilde{\pi}_{\sigma_2}, \dots, \tilde{\pi}_{\sigma_M}, \tilde{\pi}_*)$ ; and bars to gather photo-physical parameters e.g.  $\bar{\omega}^D = (\omega_0^D, \omega_1^D, \omega_*^D)$ .

The statistical notation “ $X \sim F$ ”, where  $X$  is a random variable and  $F$  is a probability distribution, indicates<sup>1–3</sup> that  $X$  is sampled from  $F$  or simply that  $X$  follows the probability measure (i.e. probability density or probability mass function) associated with  $F$ .

### Appendix B: Summary of Equations

For completeness, below we summarize the entire set of equations used in the formulation and analysis of sm-FRET measurements. In generative form and full statis-

TABLE S1. Summary of notation used in this study.

| Variable                                 | Description                                                         |
|------------------------------------------|---------------------------------------------------------------------|
| $\delta t$                               | data acquisition time                                               |
| $\delta \tau$                            | exposure time                                                       |
| $t_n$                                    | time at step $n$                                                    |
| $I_n^D$                                  | donor intensity measured at step $n$                                |
| $I_n^A$                                  | acceptor intensity measured at step $n$                             |
| $f_n^D$                                  | donor photo-state at step $n$                                       |
| $f_n^A$                                  | acceptor photo-state at step $n$                                    |
| $s_n$                                    | molecule state at step $n$                                          |
| $\sigma_m$                               | distinct molecule state                                             |
| $\pi_{\sigma_m \rightarrow \sigma_{m'}}$ | transition probability from $\sigma_m$ to $\sigma_{m'}$ in one step |
| $\pi_{* \rightarrow \sigma_m}$           | initial probability for $\sigma_m$                                  |
| $\xi^D$                                  | background donor photo-emission rate                                |
| $\xi^A$                                  | background acceptor photo-emission rate                             |
| $\lambda^S$                              | donor photo-emission rate without FRET                              |
| $\lambda_{\sigma_m}^D$                   | donor photo-emission rate of $\sigma_m$ with FRET                   |
| $\lambda_{\sigma_m}^A$                   | acceptor photo-emission rate of $\sigma_m$ with FRET                |
| $\epsilon_{\sigma_m}$                    | FRET efficiency of $\sigma_m$                                       |
| $\lambda_n^{D*}$                         | apparent donor photo-emission rate at step $n$                      |
| $\lambda_n^{A*}$                         | apparent donor photo-emission rate at step $n$                      |
| $\epsilon_n^*$                           | apparent FRET efficiency at step $n$                                |
| $\omega_n^D$                             | donor photo-activation, after dark step                             |
| $\omega_1^D$                             | donor photo-activation, after bright step                           |
| $\omega_*^D$                             | donor photo-activation, at initial step                             |
| $\omega_0^A$                             | acceptor photo-activation, after dark step                          |
| $\omega_1^A$                             | acceptor photo-activation, after bright step                        |
| $\omega_*^A$                             | acceptor photo-activation, at initial step                          |
| $c^{D \rightarrow D}$                    | donor-to-donor cross-talk coefficient                               |
| $c^{D \rightarrow A}$                    | donor-to-acceptor cross-talk coefficient                            |
| $c^{A \rightarrow A}$                    | acceptor-to-acceptor cross-talk coefficient                         |
| $c^{A \rightarrow D}$                    | acceptor-to-donor cross-talk coefficient                            |
| $q^D$                                    | quantum efficiency in the donor’s wavelength                        |
| $q^A$                                    | quantum efficiency in the acceptor’s wavelength                     |

<sup>a)</sup>Electronic mail: spress@asu.edu

tical notation, these are

$$\tilde{\beta} \sim \mathbf{GEM}_{\sigma_1, \sigma_2, \dots}(\gamma) \quad (\text{B1})$$

$$\tilde{\pi}_* | \tilde{\beta} \sim \mathbf{DP}_{\sigma_1, \sigma_2, \dots}(\alpha \tilde{\beta}) \quad (\text{B2})$$

$$\tilde{\pi}_{\sigma_m} | \tilde{\beta} \sim \mathbf{DP}_{\sigma_1, \sigma_2, \dots}(\alpha \tilde{\beta}) \quad (\text{B3})$$

$$\kappa_{\sigma_m}^D \sim \mathbf{Gamma}(\phi_{\kappa}^D, \psi_{\kappa}^D / \phi_{\kappa}^D) \quad (\text{B4})$$

$$\kappa_{\sigma_m}^A \sim \mathbf{Gamma}(\phi_{\kappa}^A, \psi_{\kappa}^A / \phi_{\kappa}^A) \quad (\text{B5})$$

$$\kappa^S \sim \mathbf{Gamma}(\phi_{\kappa}^S, \psi_{\kappa}^S / \phi_{\kappa}^S) \quad (\text{B6})$$

$$\theta \sim \mathbf{Gamma}(\phi_{\theta}, \psi_{\theta} / \phi_{\theta}) \quad (\text{B7})$$

$$\rho^D \sim \mathbf{Gamma}(\phi_{\rho}^D, \psi_{\rho}^D / \phi_{\rho}^D) \quad (\text{B8})$$

$$\rho^A \sim \mathbf{Gamma}(\phi_{\rho}^A, \psi_{\rho}^A / \phi_{\rho}^A) \quad (\text{B9})$$

$$\omega_*^D \sim \mathbf{Beta}(\eta_*^D, \zeta_*^D) \quad (\text{B10})$$

$$\omega_0^D \sim \mathbf{Beta}(\eta_0^D, \zeta_0^D) \quad (\text{B11})$$

$$\omega_1^D \sim \mathbf{Beta}(\eta_1^D, \zeta_1^D) \quad (\text{B12})$$

$$\omega_*^A \sim \mathbf{Beta}(\eta_*^A, \zeta_*^A) \quad (\text{B13})$$

$$\omega_0^A \sim \mathbf{Beta}(\eta_0^A, \zeta_0^A) \quad (\text{B14})$$

$$\omega_1^A \sim \mathbf{Beta}(\eta_1^A, \zeta_1^A) \quad (\text{B15})$$

$$s_1 | \tilde{\pi} \sim \mathbf{Categorical}_{\sigma_1, \sigma_2, \dots}(\tilde{\pi}_*) \quad (\text{B16})$$

$$f_1^D | \bar{\omega}^D \sim \mathbf{Bernoulli}(\omega_*^D) \quad (\text{B17})$$

$$f_1^A | \bar{\omega}^A \sim \mathbf{Bernoulli}(\omega_*^A) \quad (\text{B18})$$

$$s_n | s_{n-1}, \tilde{\pi} \sim \mathbf{Categorical}_{\sigma_1, \sigma_2, \dots}(\tilde{\pi}_{s_{n-1}}) \quad (\text{B19})$$

$$f_n^D | f_{n-1}^D, \bar{\omega}^D \sim \mathbf{Bernoulli}(\omega_{f_{n-1}^D}^D) \quad (\text{B20})$$

$$f_n^A | f_{n-1}^A, \bar{\omega}^A \sim \mathbf{Bernoulli}(\omega_{f_{n-1}^A}^A) \quad (\text{B21})$$

$$I_n^D | \mu_n^D \sim \mathbf{Poisson}(\mu_n^D \delta \tau) \quad (\text{B22})$$

$$I_n^A | \mu_n^A \sim \mathbf{Poisson}(\mu_n^A \delta \tau) \quad (\text{B23})$$

From those: Eqs. (B3)–(B5) apply for  $m = 1, 2, \dots$ , Eqs. (B19)–(B21) apply for  $n = 2, \dots, N$ , and Eqs. (B21)–(B22) apply for  $n = 1, \dots, N$ .

According to the parametrization of the  $\mathbf{Gamma}(\phi, \psi / \phi)$  probability distribution we employ,  $\phi$  is the usual shape parameter, and  $\psi$  is the mean value.

### Appendix C: Induced Priors on FRET Efficiency and Emission Rates

Under the Gamma priors employed on  $\theta$  and  $\kappa^S, \kappa_{\sigma_m}^D, \kappa_{\sigma_m}^A, \rho^D, \rho^A$  (see App. B), the induced (i.e. marginal) priors on FRET efficiency and photo-emission rates can be obtained by appropriate transformations of random variables<sup>4</sup>. Specifically, the

associated prior probability densities, after the involved calculus, become

$$\mathcal{P}(\epsilon_{\sigma_m}) \propto \frac{\left(\frac{1}{\epsilon_{\sigma_m}} - 1\right)^{\phi_{\kappa}^D - 1}}{\left(1 + \frac{\psi_{\kappa}^A \phi_{\kappa}^A}{\psi_{\kappa}^D \phi_{\kappa}^D} \left(\frac{1}{\epsilon_{\sigma_m}} - 1\right)\right)^{\phi_{\kappa}^D + \phi_{\kappa}^A}} \epsilon_{\sigma_m}^2 \quad (\text{C1})$$

$$\mathcal{P}(\lambda_{\sigma_m}^D) \propto \frac{K_{\phi_{\theta} - \phi_{\kappa}^D} \left(2\sqrt{\frac{\phi_{\theta} \phi_{\kappa}^D}{\psi_{\theta} \psi_{\kappa}^D}} \lambda_{\sigma_m}^D\right)}{(\lambda_{\sigma_m}^D)^{1 - \frac{\phi_{\theta} + \phi_{\kappa}^D}{2}}} \quad (\text{C2})$$

$$\mathcal{P}(\lambda_{\sigma_m}^A) \propto \frac{K_{\phi_{\theta} - \phi_{\kappa}^A} \left(2\sqrt{\frac{\phi_{\theta} \phi_{\kappa}^A}{\psi_{\theta} \psi_{\kappa}^A}} \lambda_{\sigma_m}^A\right)}{(\lambda_{\sigma_m}^A)^{1 - \frac{\phi_{\theta} + \phi_{\kappa}^A}{2}}} \quad (\text{C3})$$

$$\mathcal{P}(\lambda^S) \propto \frac{K_{\phi_{\theta} - \phi_{\kappa}^S} \left(2\sqrt{\frac{\phi_{\theta} \phi_{\kappa}^S}{\psi_{\theta} \psi_{\kappa}^S}} \lambda^S\right)}{(\lambda^S)^{1 - \frac{\phi_{\theta} + \phi_{\kappa}^S}{2}}} \quad (\text{C4})$$

$$\mathcal{P}(\xi^D) \propto \frac{K_{\phi_{\theta} - \phi_{\rho}^D} \left(2\sqrt{\frac{\phi_{\theta} \phi_{\rho}^D}{\psi_{\theta} \psi_{\rho}^D}} \xi^D\right)}{(\xi^D)^{1 - \frac{\phi_{\theta} + \phi_{\rho}^D}{2}}} \quad (\text{C5})$$

$$\mathcal{P}(\xi^A) \propto \frac{K_{\phi_{\theta} - \phi_{\rho}^A} \left(2\sqrt{\frac{\phi_{\theta} \phi_{\rho}^A}{\psi_{\theta} \psi_{\rho}^A}} \xi^A\right)}{(\xi^A)^{1 - \frac{\phi_{\theta} + \phi_{\rho}^A}{2}}} \quad (\text{C6})$$

where  $K_{\phi}$  denotes the modified Bessel function of the second kind<sup>5</sup> and, due to clarity, normalization constants in all densities are omitted.

In the case of  $\phi_{\kappa}^D = \phi_{\kappa}^A$  and  $\psi_{\kappa}^D = \psi_{\kappa}^A$ , the prior on  $\epsilon_{\sigma_m}$  takes the form of a Beta probability distribution, which becomes non-informative (uniform) under  $\phi_{\kappa}^D = \phi_{\kappa}^A = 1$ . The prior on the photo-emission rates are already in the form of K probability distributions<sup>6</sup>.

### Appendix D: Computational Scheme

A fully working version of the method described in this study, termed **bl-ICON**, in Matlab source code and GUI formats, is available in the SUPPLEMENTAL MATERIAL.

As mentioned in Sec. , the implementation generates samples from the posterior probability distribution  $\mathcal{P}(\theta, \rho^D, \rho^A, \tilde{\kappa}^D, \tilde{\kappa}^A, \tilde{\pi}, \bar{\omega}^D, \bar{\omega}^A, \vec{s}, \vec{f}^D, \vec{f}^A | \vec{I}^D, \vec{I}^A)$  through an MCMC scheme<sup>7,8</sup> that relies on Gibbs sampling.

Specifically, for the nonparametric variables, as in previous studies<sup>9–11</sup>, we use a weak limit approximation that replaces Eq. (13) with:

$$\tilde{\beta} \sim \mathbf{Dir}_{\sigma_1, \sigma_2, \dots, \sigma_M} \left( \frac{\gamma}{M}, \frac{\gamma}{M}, \dots, \frac{\gamma}{M} \right). \quad (\text{D1})$$

The existing statistical theory<sup>9,10</sup> ensures that, for sufficiently large  $M$ , Eq. (D1) yields estimates that are indistinguishable from Eq. (13).

Under Eq. (D1), our implementation generates posterior samples by iterating the following Gibbs steps:

**Step 1:** Update fluorophore and molecule states  $(\vec{f}^D, \vec{f}^A, \vec{s})$  jointly using forward filtering-backward sampling<sup>12?</sup>.

**Step 2:** Update the non-parametric base  $\tilde{\beta}$  as described previously<sup>9</sup>.

**Step 3:** Update transition probabilities  $\tilde{\pi}$ ,  $\tilde{\pi}_*$  and photo-switching probabilities  $\vec{\omega}^D$ ,  $\vec{\omega}^A$ .

**Step 4:** Update the reference photo-emission rate  $\theta$ .

**Step 5:** Update photo-emission background  $\rho^D$ ,  $\rho^A$  and fluorophore  $\tilde{\kappa}^D$ ,  $\tilde{\kappa}^A$ ,  $\kappa^S$  multipliers jointly using a Hamiltonian Monte Carlo<sup>13,14</sup> or Metropolis-Hastings-within-Gibbs<sup>7,8</sup> steps.

Due to the conjugacies<sup>2</sup> Categorical-Dirichlet and Poisson-Gamma, sampling of all variables in steps 3 and 4 is achieved directly.

Fine details of the outlined implementation can be found in the **bl-ICON**'s source code, available in the SUPPLEMENTAL MATERIAL

<sup>1</sup>U. Von Toussaint, "Bayesian inference in physics," *Reviews of Modern Physics* **83**, 943 (2011).

<sup>2</sup>A. Gelman, J. B. Carlin, H. S. Stern, D. B. Dunson, A. Vehtari, and D. B. Rubin, *Bayesian data analysis*, Vol. 2 (CRC press Boca Raton, FL, 2014).

<sup>3</sup>D. Sivia and J. Skilling, *Data analysis: a Bayesian tutorial* (OUP Oxford, 2006).

<sup>4</sup>P. M. Lee, *Bayesian statistics: an introduction* (John Wiley & Sons, 2012).

<sup>5</sup>M. Abramowitz and I. A. Stegun, *Handbook of mathematical functions: with formulas, graphs, and mathematical tables*, Vol. 55 (Courier Corporation, 1964).

<sup>6</sup>E. Jakeman, "On the statistics of k-distributed noise," *Journal of Physics A: Mathematical and General* **13**, 31 (1980).

<sup>7</sup>C. Robert and G. Casella, *Monte Carlo statistical methods* (Springer Science & Business Media, 2013).

<sup>8</sup>C. Robert and G. Casella, *Introducing Monte Carlo Methods with R* (Springer Science & Business Media, 2009).

<sup>9</sup>E. Fox, E. Sudderth, M. Jordan, and A. Willsky, "A sticky HDP-HMM with application to speaker diarization," *The Annals of Applied Statistics*, 1020–1056 (2011).

<sup>10</sup>Y. Teh, M. Jordan, M. Beal, and D. Blei, "Hierarchical Dirichlet processes," *Journal of the American Statistical Association* (2012).

<sup>11</sup>I. Sgouralis, M. Whitmore, L. Lapidus, M. J. Comstock, and S. Pressé, "Single molecule force spectroscopy at high data acquisition: A bayesian nonparametric analysis," *The Journal of chemical physics* **148**, 123320 (2018).

<sup>12</sup>C. Bishop, "Pattern recognition and machine learning (information science and statistics), 1st edn. 2006. corr. 2nd printing edn," (2007).

<sup>13</sup>R. M. Neal *et al.*, "Mcmc using hamiltonian dynamics," *Handbook of Markov Chain Monte Carlo* **2**, 2 (2011).

<sup>14</sup>M. Betancourt, "A conceptual introduction to hamiltonian monte carlo," arXiv preprint arXiv:1701.02434 (2017).
